# Supplementary material
Source: MDPI journal article supplement (https://www.mdpi.com/2227-9717/11/11/3221)
Supplement: s1 [file s1]

**Table S1.** Number of eQTLs and eGenes by tissue resulting from colocalization analysis for metabolic syndrome

| Tissue                                  | No. of eQTLs | No. of eGenes | No. of MHC eGenes | No. of eGenes <sup>-HLA</sup> |
|-----------------------------------------|--------------|---------------|-------------------|-------------------------------|
| Adipose - Subcutaneous                  | 229          | 171           | 10                | 161                           |
| Adipose - Visceral Omentum              | 142          | 113           | 8                 | 105                           |
| Adrenal Gland                           | 53           | 48            | 2                 | 46                            |
| Artery - Aorta                          | 121          | 95            | 6                 | 89                            |
| Artery - Coronary                       | 39           | 34            | 4                 | 30                            |
| Artery - Tibial                         | 162          | 125           | 6                 | 119                           |
| Brain - Amygdala                        | 18           | 18            | 3                 | 15                            |
| Brain - Anterior cingulate cortex BA24  | 28           | 22            | 3                 | 19                            |
| Brain - Caudate basal ganglia           | 49           | 45            | 3                 | 42                            |
| Brain - Cerebellar Hemisphere           | 69           | 54            | 5                 | 49                            |
| Brain - Cerebellum                      | 88           | 74            | 5                 | 69                            |
| Brain - Cortex                          | 62           | 58            | 4                 | 54                            |
| Brain - Frontal Cortex BA9              | 44           | 40            | 4                 | 36                            |
| Brain - Hippocampus                     | 25           | 22            | 3                 | 19                            |
| Brain - Hypothalamus                    | 26           | 23            | 4                 | 19                            |
| Brain - Nucleus accumbens basal ganglia | 36           | 35            | 4                 | 31                            |
| Brain - Putamen basal ganglia           | 35           | 32            | 3                 | 29                            |
| Brain - Spinal cord cervical c-1        | 10           | 10            | 2                 | 8                             |
| Brain - Substantia nigra                | 11           | 11            | 3                 | 8                             |
| Breast - Mammary Tissue                 | 110          | 93            | 5                 | 88                            |
| Cells - Cultured fibroblasts            | 196          | 150           | 2                 | 148                           |
| Cells - EBV-transformed lymphocytes     | 24           | 22            | 3                 | 19                            |
| Colon - Sigmoid                         | 93           | 74            | 4                 | 70                            |
| Colon - Transverse                      | 110          | 85            | 4                 | 81                            |
| Esophagus - Gastroesophageal Junction   | 98           | 77            | 4                 | 73                            |
| Esophagus - Mucosa                      | 184          | 138           | 6                 | 132                           |
| Esophagus - Muscularis                  | 164          | 119           | 4                 | 115                           |
| Heart - Atrial Appendage                | 120          | 92            | 5                 | 87                            |
| Heart - Left Ventricle                  | 107          | 78            | 5                 | 73                            |
| Kidney - Cortex                         | 0            | 0             | 0                 | 0                             |
| Liver                                   | 61           | 42            | 5                 | 37                            |
| Lung                                    | 156          | 130           | 9                 | 121                           |
| Minor Salivary Gland                    | 21           | 20            | 2                 | 18                            |
| Muscle - Skeletal                       | 195          | 140           | 8                 | 132                           |
| Nerve - Tibial                          | 216          | 157           | 7                 | 150                           |
| Ovary                                   | 21           | 20            | 4                 | 16                            |
| Pancreas                                | 83           | 69            | 5                 | 64                            |
| Pituitary                               | 61           | 56            | 6                 | 50                            |
| Prostate                                | 37           | 31            | 4                 | 27                            |
| Skin - Not Sun Exposed Suprapubic       | 176          | 129           | 7                 | 122                           |
| Skin - Sun Exposed Lower leg            | 218          | 170           | 9                 | 161                           |
| Small Intestine - Terminal Ileum        | 42           | 34            | 4                 | 30                            |
| Spleen                                  | 86           | 66            | 3                 | 63                            |
| Stomach                                 | 74           | 58            | 5                 | 53                            |
| Testis                                  | 155          | 110           | 7                 | 103                           |
| Thyroid                                 | 269          | 183           | 8                 | 175                           |
| Uterus                                  | 14           | 13            | 3                 | 10                            |
| Vagina                                  | 14           | 14            | 2                 | 12                            |
| Whole Blood                             | 175          | 117           | 9                 | 108                           |
| total                                   | 4577         | 3517          | 231               | 3286                          |

**Table S2.** Number of eQTLs and eGenes by tissue resulting from colocalization analysis for waist-hip ratio

| Tissue                                  | No. of eQTLs | No. of eGenes | No. of MHC eGenes | No. of eGenes <sup>-HLA</sup> |
|-----------------------------------------|--------------|---------------|-------------------|-------------------------------|
| Adipose - Subcutaneous                  | 7013         | 1125          | 27                | 1098                          |
| Adipose - Visceral Omentum              | 4848         | 787           | 26                | 761                           |
| Adrenal Gland                           | 2011         | 414           | 21                | 393                           |
| Artery - Aorta                          | 4620         | 794           | 25                | 769                           |
| Artery - Coronary                       | 1514         | 321           | 22                | 299                           |
| Artery - Tibial                         | 6572         | 1039          | 28                | 1011                          |
| Brain - Amygdala                        | 663          | 157           | 14                | 143                           |
| Brain - Anterior cingulate cortex BA24  | 1131         | 249           | 17                | 232                           |
| Brain - Caudate basal ganglia           | 1903         | 415           | 21                | 394                           |
| Brain - Cerebellar Hemisphere           | 2524         | 486           | 19                | 467                           |
| Brain - Cerebellum                      | 3299         | 605           | 23                | 582                           |
| Brain - Cortex                          | 2317         | 470           | 20                | 450                           |
| Brain - Frontal Cortex BA9              | 1615         | 330           | 20                | 310                           |
| Brain - Hippocampus                     | 1199         | 262           | 15                | 247                           |
| Brain - Hypothalamus                    | 1233         | 263           | 18                | 245                           |
| Brain - Nucleus accumbens basal ganglia | 1936         | 416           | 23                | 393                           |
| Brain - Putamen basal ganglia           | 1431         | 320           | 19                | 301                           |
| Brain - Spinal cord cervical c-1        | 823          | 201           | 14                | 187                           |
| Brain - Substantia nigra                | 515          | 148           | 12                | 136                           |
| Breast - Mammary Tissue                 | 3888         | 645           | 26                | 619                           |
| Cells - Cultured fibroblasts            | 6235         | 1083          | 20                | 1063                          |
| Cells - EBV-transformed lymphocytes     | 1047         | 239           | 18                | 221                           |
| Colon - Sigmoid                         | 3399         | 587           | 21                | 566                           |
| Colon - Transverse                      | 3603         | 597           | 25                | 572                           |
| Esophagus - Gastroesophageal Junction   | 3629         | 615           | 24                | 591                           |
| Esophagus - Mucosa                      | 5861         | 920           | 26                | 894                           |
| Esophagus - Muscularis                  | 5456         | 917           | 25                | 892                           |
| Heart - Atrial Appendage                | 3656         | 667           | 22                | 645                           |
| Heart - Left Ventricle                  | 3437         | 599           | 21                | 578                           |
| Kidney - Cortex                         | 212          | 56            | 7                 | 49                            |
| Liver                                   | 1508         | 279           | 22                | 257                           |
| Lung                                    | 5674         | 850           | 25                | 825                           |
| Minor Salivary Gland                    | 736          | 201           | 14                | 187                           |
| Muscle - Skeletal                       | 5614         | 957           | 25                | 932                           |
| Nerve - Tibial                          | 7168         | 1210          | 26                | 1184                          |
| Ovary                                   | 1077         | 262           | 17                | 245                           |
| Pancreas                                | 3058         | 532           | 21                | 511                           |
| Pituitary                               | 2753         | 511           | 21                | 490                           |
| Prostate                                | 1930         | 378           | 23                | 355                           |
| Skin - Not Sun Exposed Suprapubic       | 6110         | 983           | 30                | 953                           |
| Skin - Sun Exposed Lower leg            | 7421         | 1129          | 30                | 1099                          |
| Small Intestine - Terminal Ileum        | 1264         | 303           | 16                | 287                           |
| Spleen                                  | 2549         | 525           | 22                | 503                           |
| Stomach                                 | 2711         | 477           | 24                | 453                           |
| Testis                                  | 5165         | 927           | 24                | 903                           |
| Thyroid                                 | 8215         | 1257          | 30                | 1227                          |
| Uterus                                  | 648          | 175           | 13                | 162                           |
| Vagina                                  | 775          | 178           | 18                | 160                           |
| Whole Blood                             | 5820         | 874           | 27                | 847                           |
| total                                   | 157786       | 27735         | 1047              | 26688                         |

**Table S3.** Number of eQTLs and eGenes by tissue resulting from colocalization analysis for fasting blood glucose

| Tissue                                  | No. of eQTLs | No. of eGenes | No. of MHC eGenes | No. of eGenes <sup>-HLA</sup> |
|-----------------------------------------|--------------|---------------|-------------------|-------------------------------|
| Adipose - Subcutaneous                  | 123          | 83            | 0                 | 83                            |
| Adipose - Visceral Omentum              | 83           | 60            | 0                 | 60                            |
| Adrenal Gland                           | 22           | 19            | 0                 | 19                            |
| Artery - Aorta                          | 70           | 52            | 0                 | 52                            |
| Artery - Coronary                       | 11           | 11            | 0                 | 11                            |
| Artery - Tibial                         | 111          | 84            | 0                 | 84                            |
| Brain - Amygdala                        | 0            | 0             | 0                 | 0                             |
| Brain - Anterior cingulate cortex BA24  | 20           | 15            | 0                 | 15                            |
| Brain - Caudate basal ganglia           | 20           | 17            | 0                 | 17                            |
| Brain - Cerebellar Hemisphere           | 45           | 30            | 0                 | 30                            |
| Brain - Cerebellum                      | 54           | 41            | 0                 | 41                            |
| Brain - Cortex                          | 24           | 21            | 0                 | 21                            |
| Brain - Frontal Cortex BA9              | 17           | 11            | 0                 | 11                            |
| Brain - Hippocampus                     | 9            | 6             | 0                 | 6                             |
| Brain - Hypothalamus                    | 10           | 7             | 0                 | 7                             |
| Brain - Nucleus accumbens basal ganglia | 23           | 21            | 0                 | 21                            |
| Brain - Putamen basal ganglia           | 16           | 11            | 0                 | 11                            |
| Brain - Spinal cord cervical c-1        | 6            | 4             | 0                 | 4                             |
| Brain - Substantia nigra                | 2            | 2             | 0                 | 2                             |
| Breast - Mammary Tissue                 | 61           | 47            | 0                 | 47                            |
| Cells - Cultured fibroblasts            | 120          | 82            | 0                 | 82                            |
| Cells - EBV-transformed lymphocytes     | 10           | 10            | 0                 | 10                            |
| Colon - Sigmoid                         | 55           | 40            | 0                 | 40                            |
| Colon - Transverse                      | 54           | 40            | 0                 | 40                            |
| Esophagus - Gastroesophageal Junction   | 63           | 45            | 0                 | 45                            |
| Esophagus - Mucosa                      | 107          | 77            | 0                 | 77                            |
| Esophagus - Muscularis                  | 110          | 79            | 0                 | 79                            |
| Heart - Atrial Appendage                | 66           | 47            | 0                 | 47                            |
| Heart - Left Ventricle                  | 48           | 36            | 0                 | 36                            |
| Kidney - Cortex                         | 0            | 0             | 0                 | 0                             |
| Liver                                   | 33           | 22            | 0                 | 22                            |
| Lung                                    | 100          | 68            | 0                 | 68                            |
| Minor Salivary Gland                    | 11           | 10            | 0                 | 10                            |
| Muscle - Skeletal                       | 115          | 75            | 0                 | 75                            |
| Nerve - Tibial                          | 143          | 101           | 0                 | 101                           |
| Ovary                                   | 9            | 8             | 0                 | 8                             |
| Pancreas                                | 54           | 42            | 0                 | 42                            |
| Pituitary                               | 39           | 35            | 0                 | 35                            |
| Prostate                                | 24           | 21            | 0                 | 21                            |
| Skin - Not Sun Exposed Suprapubic       | 136          | 92            | 0                 | 92                            |
| Skin - Sun Exposed Lower leg            | 160          | 111           | 0                 | 110                           |
| Small Intestine - Terminal Ileum        | 21           | 16            | 0                 | 16                            |
| Spleen                                  | 58           | 46            | 0                 | 46                            |
| Stomach                                 | 40           | 27            | 0                 | 27                            |
| Testis                                  | 99           | 73            | 0                 | 73                            |
| Thyroid                                 | 186          | 120           | 0                 | 120                           |
| Uterus                                  | 2            | 2             | 0                 | 2                             |
| Vagina                                  | 5            | 5             | 0                 | 5                             |
| Whole Blood                             | 99           | 71            | 0                 | 71                            |
| total                                   | 2694         | 1943          | 0                 | 1942                          |

**Table S4.** Number of eQTLs and eGenes by tissue resulting from colocalization analysis for glucose measurement

| Tissue                                    | No. of eQTLs | No. of eGenes | No. of MHC eGenes | No. of eGenes <sup>-HLA</sup> |
|-------------------------------------------|--------------|---------------|-------------------|-------------------------------|
| Adipose - Subcutaneous                    | 980          | 483           | 11                | 472                           |
| Adipose - Visceral (Omentum)              | 636          | 320           | 10                | 310                           |
| Adrenal Gland                             | 253          | 159           | 4                 | 155                           |
| Artery - Aorta                            | 662          | 335           | 8                 | 327                           |
| Artery - Coronary                         | 169          | 104           | 2                 | 102                           |
| Artery - Tibial                           | 934          | 457           | 10                | 447                           |
| Brain - Amygdala                          | 61           | 37            | 2                 | 35                            |
| Brain - Anterior cingulate cortex (BA24)  | 156          | 94            | 3                 | 91                            |
| Brain - Caudate (basal ganglia)           | 208          | 127           | 2                 | 125                           |
| Brain - Cerebellar Hemisphere             | 329          | 184           | 2                 | 182                           |
| Brain - Cerebellum                        | 422          | 233           | 2                 | 231                           |
| Brain - Cortex                            | 277          | 170           | 4                 | 166                           |
| Brain - Frontal Cortex (BA9)              | 193          | 115           | 2                 | 113                           |
| Brain - Hippocampus                       | 143          | 85            | 2                 | 83                            |
| Brain - Hypothalamus                      | 140          | 82            | 3                 | 79                            |
| Brain - Nucleus accumbens (basal ganglia) | 238          | 136           | 4                 | 132                           |
| Brain - Putamen (basal ganglia)           | 193          | 114           | 2                 | 112                           |
| Brain - Spinal cord (cervical c-1)        | 99           | 61            | 1                 | 60                            |
| Brain - Substantia nigra                  | 48           | 34            | 2                 | 32                            |
| Breast - Mammary Tissue                   | 499          | 255           | 8                 | 247                           |
| Cells - Cultured fibroblasts              | 868          | 443           | 4                 | 439                           |
| Cells - EBV-transformed lymphocytes       | 96           | 69            | 3                 | 66                            |
| Colon - Sigmoid                           | 483          | 254           | 4                 | 250                           |
| Colon - Transverse                        | 478          | 260           | 7                 | 253                           |
| Esophagus - Gastroesophageal Junction     | 477          | 247           | 3                 | 244                           |
| Esophagus - Mucosa                        | 818          | 412           | 9                 | 403                           |
| Esophagus - Muscularis                    | 787          | 404           | 5                 | 399                           |
| Heart - Atrial Appendage                  | 501          | 254           | 7                 | 247                           |
| Heart - Left Ventricle                    | 430          | 239           | 7                 | 232                           |
| Kidney - Cortex                           | 8            | 8             | 1                 | 7                             |
| Liver                                     | 196          | 109           | 3                 | 106                           |
| Lung                                      | 723          | 361           | 10                | 351                           |
| Minor Salivary Gland                      | 109          | 74            | 2                 | 72                            |
| Muscle - Skeletal                         | 868          | 422           | 10                | 412                           |
| Nerve - Tibial                            | 1087         | 537           | 10                | 527                           |
| Ovary                                     | 108          | 78            | 2                 | 76                            |
| Pancreas                                  | 434          | 245           | 4                 | 241                           |
| Pituitary                                 | 363          | 200           | 4                 | 196                           |
| Prostate                                  | 226          | 131           | 4                 | 127                           |
| Skin - Not Sun Exposed (Suprapubic)       | 863          | 416           | 5                 | 411                           |
| Skin - Sun Exposed (Lower leg)            | 1017         | 509           | 8                 | 501                           |
| Small Intestine - Terminal Ileum          | 143          | 96            | 3                 | 93                            |
| Spleen                                    | 387          | 216           | 2                 | 214                           |
| Stomach                                   | 337          | 187           | 5                 | 182                           |
| Testis                                    | 763          | 421           | 8                 | 413                           |
| Thyroid                                   | 1128         | 551           | 11                | 540                           |
| Uterus                                    | 62           | 43            | 2                 | 41                            |
| Vagina                                    | 56           | 39            | 2                 | 37                            |
| Whole Blood                               | 754          | 410           | 10                | 400                           |
| total                                     | 21210        | 11220         | 239               | 10981                         |

**Table S5.** Number of eQTLs and eGenes by tissue resulting from colocalization analysis for systolic blood pressure

| Tissue                                  | No. of eQTLs | No. of eGenes | No. of MHC eGenes | No. of eGenes <sup>-HLA</sup> |
|-----------------------------------------|--------------|---------------|-------------------|-------------------------------|
| Adipose - Subcutaneous                  | 2052         | 967           | 10                | 957                           |
| Adipose - Visceral Omentum              | 1280         | 637           | 11                | 626                           |
| Adrenal Gland                           | 674          | 361           | 2                 | 359                           |
| Artery - Aorta                          | 1495         | 722           | 11                | 711                           |
| Artery - Coronary                       | 444          | 233           | 3                 | 230                           |
| Artery - Tibial                         | 2003         | 955           | 10                | 945                           |
| Brain - Amygdala                        | 164          | 105           | 1                 | 104                           |
| Brain - Anterior cingulate cortex BA24  | 318          | 177           | 2                 | 175                           |
| Brain - Caudate basal ganglia           | 543          | 322           | 3                 | 319                           |
| Brain - Cerebellar Hemisphere           | 771          | 401           | 3                 | 398                           |
| Brain - Cerebellum                      | 976          | 494           | 4                 | 490                           |
| Brain - Cortex                          | 693          | 373           | 2                 | 371                           |
| Brain - Frontal Cortex BA9              | 448          | 244           | 2                 | 242                           |
| Brain - Hippocampus                     | 360          | 191           | 1                 | 190                           |
| Brain - Hypothalamus                    | 279          | 175           | 2                 | 173                           |
| Brain - Nucleus accumbens basal ganglia | 533          | 283           | 2                 | 281                           |
| Brain - Putamen basal ganglia           | 424          | 253           | 3                 | 250                           |
| Brain - Spinal cord cervical c-1        | 229          | 125           | 2                 | 123                           |
| Brain - Substantia nigra                | 129          | 79            | 1                 | 78                            |
| Breast - Mammary Tissue                 | 1038         | 524           | 11                | 513                           |
| Cells - Cultured fibroblasts            | 1913         | 906           | 5                 | 901                           |
| Cells - EBV-transformed lymphocytes     | 266          | 144           | 4                 | 140                           |
| Colon - Sigmoid                         | 1013         | 497           | 6                 | 491                           |
| Colon - Transverse                      | 1065         | 537           | 7                 | 530                           |
| Esophagus - Gastroesophageal Junction   | 992          | 521           | 7                 | 514                           |
| Esophagus - Mucosa                      | 1681         | 799           | 8                 | 791                           |
| Esophagus - Muscularis                  | 1644         | 829           | 7                 | 822                           |
| Heart - Atrial Appendage                | 1120         | 573           | 8                 | 565                           |
| Heart - Left Ventricle                  | 921          | 505           | 7                 | 498                           |
| Kidney - Cortex                         | 56           | 33            | 0                 | 33                            |
| Liver                                   | 367          | 211           | 4                 | 207                           |
| Lung                                    | 1521         | 747           | 10                | 737                           |
| Minor Salivary Gland                    | 266          | 137           | 2                 | 135                           |
| Muscle - Skeletal                       | 1747         | 866           | 8                 | 858                           |
| Nerve - Tibial                          | 2221         | 1094          | 13                | 1081                          |
| Ovary                                   | 259          | 165           | 3                 | 162                           |
| Pancreas                                | 995          | 470           | 7                 | 463                           |
| Pituitary                               | 717          | 382           | 6                 | 376                           |
| Prostate                                | 483          | 258           | 5                 | 253                           |
| Skin - Not Sun Exposed Suprapubic       | 1658         | 825           | 10                | 815                           |
| Skin - Sun Exposed Lower leg            | 2074         | 983           | 10                | 973                           |
| Small Intestine - Terminal Ileum        | 359          | 216           | 5                 | 211                           |
| Spleen                                  | 818          | 439           | 4                 | 435                           |
| Stomach                                 | 768          | 392           | 10                | 382                           |
| Testis                                  | 1689         | 832           | 7                 | 825                           |
| Thyroid                                 | 2243         | 1086          | 12                | 1074                          |
| Uterus                                  | 157          | 97            | 3                 | 94                            |
| Vagina                                  | 163          | 103           | 3                 | 100                           |
| Whole Blood                             | 1507         | 762           | 10                | 752                           |
| total                                   | 45536        | 23030         | 277               | 22753                         |

**Table S6.** Number of eQTLs and eGenes by tissue resulting from colocalization analysis for diastolic blood pressure

| Tissue                                  | No. of eQTLs | No. of eGenes | No. of MHC eGenes | No. of eGenes <sup>-HLA</sup> |
|-----------------------------------------|--------------|---------------|-------------------|-------------------------------|
| Adipose - Subcutaneous                  | 1439         | 799           | 17                | 784                           |
| Adipose - Visceral Omentum              | 944          | 546           | 14                | 532                           |
| Adrenal Gland                           | 443          | 288           | 6                 | 282                           |
| Artery - Aorta                          | 1053         | 610           | 12                | 598                           |
| Artery - Coronary                       | 319          | 196           | 5                 | 191                           |
| Artery - Tibial                         | 1390         | 774           | 13                | 762                           |
| Brain - Amygdala                        | 123          | 81            | 3                 | 78                            |
| Brain - Anterior cingulate cortex BA24  | 226          | 139           | 3                 | 136                           |
| Brain - Caudate basal ganglia           | 360          | 240           | 4                 | 236                           |
| Brain - Cerebellar Hemisphere           | 518          | 307           | 7                 | 300                           |
| Brain - Cerebellum                      | 666          | 396           | 10                | 386                           |
| Brain - Cortex                          | 455          | 279           | 5                 | 274                           |
| Brain - Frontal Cortex BA9              | 320          | 197           | 3                 | 194                           |
| Brain - Hippocampus                     | 226          | 143           | 2                 | 141                           |
| Brain - Hypothalamus                    | 225          | 141           | 2                 | 139                           |
| Brain - Nucleus accumbens basal ganglia | 364          | 229           | 6                 | 224                           |
| Brain - Putamen basal ganglia           | 277          | 187           | 3                 | 184                           |
| Brain - Spinal cord cervical c-1        | 174          | 111           | 3                 | 109                           |
| Brain - Substantia nigra                | 100          | 70            | 1                 | 69                            |
| Breast - Mammary Tissue                 | 754          | 459           | 12                | 448                           |
| Cells - Cultured fibroblasts            | 1309         | 735           | 11                | 725                           |
| Cells - EBV-transformed lymphocytes     | 194          | 109           | 3                 | 106                           |
| Colon - Sigmoid                         | 729          | 412           | 8                 | 404                           |
| Colon - Transverse                      | 782          | 453           | 9                 | 444                           |
| Esophagus - Gastroesophageal Junction   | 692          | 416           | 9                 | 407                           |
| Esophagus - Mucosa                      | 1185         | 673           | 14                | 660                           |
| Esophagus - Muscularis                  | 1169         | 681           | 12                | 669                           |
| Heart - Atrial Appendage                | 725          | 440           | 9                 | 431                           |
| Heart - Left Ventricle                  | 599          | 377           | 9                 | 368                           |
| Kidney - Cortex                         | 45           | 26            | 0                 | 26                            |
| Liver                                   | 276          | 170           | 6                 | 164                           |
| Lung                                    | 1084         | 607           | 14                | 594                           |
| Minor Salivary Gland                    | 176          | 107           | 0                 | 107                           |
| Muscle - Skeletal                       | 1179         | 691           | 15                | 677                           |
| Nerve - Tibial                          | 1508         | 858           | 15                | 843                           |
| Ovary                                   | 222          | 157           | 5                 | 152                           |
| Pancreas                                | 685          | 383           | 9                 | 374                           |
| Pituitary                               | 504          | 327           | 9                 | 318                           |
| Prostate                                | 374          | 230           | 5                 | 225                           |
| Skin - Not Sun Exposed Suprapubic       | 1195         | 690           | 19                | 672                           |
| Skin - Sun Exposed Lower leg            | 1461         | 816           | 19                | 799                           |
| Small Intestine - Terminal Ileum        | 275          | 175           | 1                 | 174                           |
| Spleen                                  | 582          | 350           | 6                 | 344                           |
| Stomach                                 | 543          | 330           | 10                | 320                           |
| Testis                                  | 1159         | 647           | 12                | 635                           |
| Thyroid                                 | 1549         | 868           | 15                | 854                           |
| Uterus                                  | 113          | 84            | 1                 | 83                            |
| Vagina                                  | 115          | 82            | 2                 | 80                            |
| Whole Blood                             | 1051         | 602           | 18                | 586                           |
| total                                   | 31856        | 18688         | 396               | 18308                         |

**Table S7.** Number of eQTLs and eGenes by tissue resulting from colocalization analysis for triglyceride

| Tissue                                  | No. of eQTLs | No. of eGenes | No. of MHC eGenes | No. of eGenes <sup>-HLA</sup> |
|-----------------------------------------|--------------|---------------|-------------------|-------------------------------|
| Adipose - Subcutaneous                  | 2767         | 922           | 24                | 898                           |
| Adipose - Visceral Omentum              | 1837         | 652           | 22                | 630                           |
| Adrenal Gland                           | 681          | 298           | 11                | 287                           |
| Artery - Aorta                          | 1755         | 658           | 21                | 637                           |
| Artery - Coronary                       | 464          | 220           | 12                | 208                           |
| Artery - Tibial                         | 2348         | 869           | 21                | 848                           |
| Brain - Amygdala                        | 177          | 107           | 5                 | 102                           |
| Brain - Anterior cingulate cortex BA24  | 381          | 178           | 8                 | 170                           |
| Brain - Caudate basal ganglia           | 632          | 304           | 14                | 290                           |
| Brain - Cerebellar Hemisphere           | 925          | 379           | 12                | 367                           |
| Brain - Cerebellum                      | 1123         | 478           | 14                | 464                           |
| Brain - Cortex                          | 795          | 342           | 10                | 332                           |
| Brain - Frontal Cortex BA9              | 543          | 250           | 10                | 240                           |
| Brain - Hippocampus                     | 418          | 180           | 8                 | 172                           |
| Brain - Hypothalamus                    | 375          | 180           | 9                 | 171                           |
| Brain - Nucleus accumbens basal ganglia | 592          | 297           | 14                | 283                           |
| Brain - Putamen basal ganglia           | 511          | 222           | 10                | 212                           |
| Brain - Spinal cord cervical c-1        | 240          | 138           | 7                 | 131                           |
| Brain - Substantia nigra                | 143          | 81            | 6                 | 75                            |
| Breast - Mammary Tissue                 | 1456         | 529           | 21                | 508                           |
| Cells - Cultured fibroblasts            | 2516         | 913           | 18                | 895                           |
| Cells - EBV-transformed lymphocytes     | 289          | 159           | 11                | 148                           |
| Colon - Sigmoid                         | 1292         | 456           | 13                | 443                           |
| Colon - Transverse                      | 1339         | 515           | 19                | 496                           |
| Esophagus - Gastroesophageal Junction   | 1316         | 477           | 19                | 458                           |
| Esophagus - Mucosa                      | 2181         | 755           | 19                | 736                           |
| Esophagus - Muscularis                  | 2199         | 779           | 18                | 761                           |
| Heart - Atrial Appendage                | 1463         | 516           | 18                | 498                           |
| Heart - Left Ventricle                  | 1287         | 449           | 18                | 431                           |
| Kidney - Cortex                         | 56           | 35            | 1                 | 34                            |
| Liver                                   | 786          | 266           | 10                | 256                           |
| Lung                                    | 1941         | 717           | 21                | 696                           |
| Minor Salivary Gland                    | 338          | 150           | 4                 | 146                           |
| Muscle - Skeletal                       | 2132         | 789           | 20                | 769                           |
| Nerve - Tibial                          | 2900         | 1055          | 23                | 1032                          |
| Ovary                                   | 423          | 182           | 8                 | 174                           |
| Pancreas                                | 1081         | 431           | 19                | 412                           |
| Pituitary                               | 980          | 389           | 16                | 373                           |
| Prostate                                | 598          | 257           | 8                 | 249                           |
| Skin - Not Sun Exposed Suprapubic       | 2332         | 834           | 22                | 812                           |
| Skin - Sun Exposed Lower leg            | 2841         | 979           | 23                | 956                           |
| Small Intestine - Terminal Ileum        | 480          | 205           | 10                | 195                           |
| Spleen                                  | 1022         | 408           | 11                | 397                           |
| Stomach                                 | 1064         | 378           | 17                | 361                           |
| Testis                                  | 1949         | 786           | 18                | 768                           |
| Thyroid                                 | 3099         | 1088          | 25                | 1063                          |
| Uterus                                  | 183          | 99            | 6                 | 93                            |
| Vagina                                  | 211          | 116           | 7                 | 109                           |
| Whole Blood                             | 2172         | 765           | 25                | 740                           |
| total                                   | 58633        | 22232         | 706               | 21526                         |

**Table S8.** Number of eQTLs and eGenes by tissue resulting from colocalization analysis for high-density lipoprotein

| Tissue                                  | No. of eQTLs | No. of eGenes | No. of MHC eGenes | No. of eGenes <sup>-HLA</sup> |
|-----------------------------------------|--------------|---------------|-------------------|-------------------------------|
| Adipose - Subcutaneous                  | 3400         | 1050          | 23                | 1027                          |
| Adipose - Visceral Omentum              | 2254         | 747           | 20                | 727                           |
| Adrenal Gland                           | 924          | 357           | 11                | 346                           |
| Artery - Aorta                          | 2115         | 744           | 19                | 725                           |
| Artery - Coronary                       | 668          | 281           | 12                | 269                           |
| Artery - Tibial                         | 2960         | 998           | 22                | 976                           |
| Brain - Amygdala                        | 291          | 133           | 7                 | 126                           |
| Brain - Anterior cingulate cortex BA24  | 480          | 195           | 10                | 185                           |
| Brain - Caudate basal ganglia           | 798          | 337           | 14                | 323                           |
| Brain - Cerebellar Hemisphere           | 1189         | 426           | 10                | 416                           |
| Brain - Cerebellum                      | 1502         | 546           | 13                | 533                           |
| Brain - Cortex                          | 1030         | 374           | 11                | 363                           |
| Brain - Frontal Cortex BA9              | 724          | 278           | 13                | 265                           |
| Brain - Hippocampus                     | 572          | 222           | 9                 | 213                           |
| Brain - Hypothalamus                    | 466          | 206           | 8                 | 198                           |
| Brain - Nucleus accumbens basal ganglia | 832          | 320           | 11                | 309                           |
| Brain - Putamen basal ganglia           | 585          | 254           | 10                | 244                           |
| Brain - Spinal cord cervical c-1        | 355          | 169           | 13                | 156                           |
| Brain - Substantia nigra                | 211          | 95            | 8                 | 87                            |
| Breast - Mammary Tissue                 | 1823         | 619           | 18                | 601                           |
| Cells - Cultured fibroblasts            | 3114         | 1023          | 14                | 1009                          |
| Cells - EBV-transformed lymphocytes     | 410          | 189           | 14                | 175                           |
| Colon - Sigmoid                         | 1557         | 548           | 13                | 535                           |
| Colon - Transverse                      | 1709         | 582           | 19                | 563                           |
| Esophagus - Gastroesophageal Junction   | 1645         | 556           | 15                | 541                           |
| Esophagus - Mucosa                      | 2778         | 881           | 18                | 863                           |
| Esophagus - Muscularis                  | 2690         | 912           | 17                | 895                           |
| Heart - Atrial Appendage                | 1837         | 632           | 17                | 615                           |
| Heart - Left Ventricle                  | 1557         | 549           | 16                | 533                           |
| Kidney - Cortex                         | 115          | 54            | 4                 | 50                            |
| Liver                                   | 965          | 298           | 11                | 287                           |
| Lung                                    | 2539         | 808           | 20                | 788                           |
| Minor Salivary Gland                    | 426          | 170           | 10                | 160                           |
| Muscle - Skeletal                       | 2702         | 929           | 19                | 910                           |
| Nerve - Tibial                          | 3696         | 1196          | 20                | 1176                          |
| Ovary                                   | 505          | 220           | 9                 | 211                           |
| Pancreas                                | 1467         | 512           | 15                | 497                           |
| Pituitary                               | 1190         | 434           | 16                | 418                           |
| Prostate                                | 789          | 315           | 14                | 301                           |
| Skin - Not Sun Exposed Suprapubic       | 3099         | 974           | 24                | 950                           |
| Skin - Sun Exposed Lower leg            | 3605         | 1117          | 21                | 1096                          |
| Small Intestine - Terminal Ileum        | 659          | 250           | 10                | 240                           |
| Spleen                                  | 1295         | 470           | 13                | 457                           |
| Stomach                                 | 1354         | 431           | 17                | 414                           |
| Testis                                  | 2507         | 859           | 13                | 846                           |
| Thyroid                                 | 3695         | 1200          | 20                | 1180                          |
| Uterus                                  | 271          | 120           | 7                 | 113                           |
| Vagina                                  | 312          | 133           | 7                 | 126                           |
| Whole Blood                             | 2754         | 846           | 22                | 824                           |
| total                                   | 74421        | 25559         | 697               | 24862                         |
